# Supplementary material
Source: Springer Nature journal article supplement (https://www.springermedizin.de/resource/supplementary/12891_2007_466_MOESM2_ESM.pdf/9511502)
Supplement: MOESM2 [file 9511502]

Assessed for eligibility (n=148)

**Enrollment**

Randomisation

| Excluded (n= 87)               |        |
|--------------------------------|--------|
| Not meeting inclusion criteria | (n=85) |
| Resident outside the region    | 5      |
| Age                            | 20     |
| Co-morbidity                   | 10     |
| RoM >80° at T1                 | 32     |
| Longer hospital stay           | 8      |
| Minimally invasive surgery     | 6      |
| Extended surgery               | 4      |
| Refused to participate         | (n= 2) |

Allocated to CPM +PT intervention (n=30)  
Received allocated intervention (n=30)

**Allocation**

Allocated to PT intervention (n=30)  
Received allocated intervention (n=30)

Lost to follow-up (n=0)  
Discontinued intervention (n= 0)

**Follow-Up**

Lost to follow-up (n=0)  
Discontinued intervention (n= 0)

Analysed (n=30)  
Excluded from analysis (n=0)

**Analysis**

Analysed (n=30)  
Excluded from analysis (n=0)
